# Supplementary material for: A density functional theory study on the mechanism of toluene from dimethylcyclopentane catalyzed by the [GaH]2+ active site of Ga-ZSM-5
Source: Royal Society of Chemistry journal article supplement (doi:10.1039/d3cp04416e), 2024-01-01
Supplement: d3cp04416e1.pdf [file d3cp04416e1.pdf]

# Density functional theory study on the mechanism of toluene from dimethylcyclopentane catalyzed by $[\text{GaH}]^{2+}$ active site of Ga-ZSM-5

Hongyan Liu,<sup>a,b</sup> Furong Sun,<sup>a</sup> Junzhuo Xu<sup>a</sup>, Hairong Zhang,<sup>a,b\*</sup> Tingting Wu<sup>a</sup>,  
Shenghua Han<sup>a</sup>, Shijun Zhang<sup>b</sup>, Yan Mo<sup>b</sup>, Lixia Ling,<sup>b,c</sup> Riguang Zhang,<sup>b</sup> Maohong  
Fan<sup>d\*</sup>, Baojun Wang<sup>b,c\*</sup>

<sup>a</sup> *College of Chemistry and Chemical Engineering, Shanxi Datong University, Datong 037009,  
Shanxi, P.R. China*

<sup>b</sup> *State Key Laboratory of Clean and Efficient Coal Utilization, Taiyuan University of Technology,  
Taiyuan, Shanxi 030024, PR China*

<sup>c</sup> *College of Chemistry Engineering and Technology, Taiyuan University of Technology, Taiyuan,  
Shanxi 030024, PR China*

<sup>d</sup> *College of Engineering and Physical Sciences, and School of Energy Resources, University of  
Wyoming, Laramie, WY 82071, USA*

---

\* Corresponding author at: No. 79 Yingze West Street, Taiyuan 030024, China.  
*E-mail address:* 673839261@qq.com(H.R. Zhang); mfan@uwyo.edu (M. Fan); wangbaojun@tyut.edu.cn (B.J. Wang).

Table S1 Geometric parameters of reactants, transition states and products in 1th HT, 1th DH and 2th HT from dimethylcyclopentane to methylcyclohexene

(The corresponding structures of A(A'), TS1(TS1'), B(B'), TS2(TS2'), G(G'), TS5(TS5') are shown in Figure 3)

| /Å     | A(A')            | TS1(TS1')        | B(B')            | TS2(TS2')        | G(G')            | TS5(TS5')        | I(I')            |
|--------|------------------|------------------|------------------|------------------|------------------|------------------|------------------|
| Ga-O1  | 1.956<br>(2.150) | 2.005<br>(1.997) | 2.047<br>(2.018) | 1.964<br>(1.951) | -                | -                |                  |
| Ga-O2  | 1.877<br>(1.919) | 1.960<br>(1.956) | 2.025<br>(2.032) | 1.918<br>(1.937) | -                | -                |                  |
| Ga-O3  | 2.773<br>(2.049) | 2.864<br>(2.851) | 3.140<br>(3.099) | 2.817<br>(2.791) | 3.053<br>(3.039) | 3.193<br>(3.225) | 3.307<br>(3.454) |
| C1-H1  | 1.146<br>(1.144) | 1.410<br>(1.408) | -                | -                | -                | -                |                  |
| Ga- C1 | 2.709<br>(2.879) | 2.110<br>(2.117) | -                | -                | 1.961<br>(1.959) | 3.351<br>(3.562) | 3.838<br>(3.937) |
| O3-H1  | 2.263<br>(2.449) | 1.283<br>(1.268) | 0.974<br>(0.970) | 1.320<br>(1.342) | -                | -                |                  |
| H-H1   | -                | -                | 4.273<br>(3.342) | 0.944<br>(0.929) | -                | -                |                  |
| Ga- H  | -                | -                | 1.552<br>(1.558) | 1.777<br>(1.760) | -                | -                |                  |
| C1-C6  | -                | -                | -                | -                | 1.539<br>(1.536) | 1.382<br>(1.384) | 1.338<br>(1.339) |
| C6-H7  | -                | -                | -                | -                | 1.091<br>(1.091) | 1.289<br>(1.269) | 2.275<br>(2.354) |
| O4-H7  | -                | -                | -                | -                | 2.438<br>(2.472) | 1.400<br>(1.457) | 0.986<br>(0.984) |

Table S2 Mulliken charges of important atoms of reactants, transition states and products in 1th HT, 1th DH and 2th HT from dimethylcyclopentane to methylcyclohexene  
(The corresponding structures of A(A'), TS1(TS1'), B(B'), TS2(TS2'), G(G'), TS5(TS5') are shown in Figure 3)

| /e | A(A')    | TS1(TS1') | B(B')    | TS2(TS2') | G(G')    | TS5(TS5') | I(I')    |
|----|----------|-----------|----------|-----------|----------|-----------|----------|
| Ga | 0.463    | 0.201     | 0.092    | 0.350     | 0.604    | 0.414     | 0.446    |
|    | (0.472)  | (0.219)   | (0.084)  | (0.368)   | (0.585)  | (0.396)   | (0.433)  |
| O1 | -0.611   | -0.598    | -0.583   | -0.585    | -        | -         |          |
|    | (-0.660) | (-0.594)  | (-0.562) | (-0.583)  |          |           |          |
| O2 | -0.515   | -0.546    | -0.545   | -0.556    | -        | -         |          |
|    | (-0.537) | (-0.546)  | (-0.563) | (-0.570)  |          |           |          |
| O3 | -0.641   | -0.638    | -0.503   | -0.646    | -        | -         |          |
|    | (-0.610) | (-0.632)  | (-0.497) | (-0.646)  |          |           |          |
| C1 | 0.113    | -0.126    | -        | -         | 0.061    | 0.275     | -0.191   |
|    | (0.184)  | (-0.102)  |          |           | (0.045)  | (0.269)   | (-0.226) |
| H1 | 0.102    | 0.440     | 0.387    | 0.360     | -        | -         |          |
|    | (0.061)  | (0.434)   | (0.370)  | (0.358)   |          |           |          |
| H  | -        | -         | 0.145    | -0.015    | -        | -         |          |
|    |          |           | (0.123)  | (0.002)   |          |           |          |
| C6 | -        | -         | -        | -         | -0.340   | -0.512    | -0.191   |
|    |          |           |          |           | (-0.276) | (-0.455)  | (-0.127) |
| H7 | -        | -         | -        | -         | 0.196    | 0.418     | 0.394    |
|    |          |           |          |           | (0.191)  | (0.411)   | (0.390)  |
| O4 | -        | -         | -        | -         | -0.650   | -0.666    | -0.518   |
|    |          |           |          |           | (-0.649) | (-0.675)  | (-0.519) |

Table S3 Geometric parameters from reactants to transition states in the ring expansion process from dimethylcyclopentane to methylcyclohexene  
 (The corresponding structures of E(E'), TS3(TS3'), F(F'), TS4(TS4') are shown in Figure 3)

| /Å       | E(E')            | TS3(TS3')        | F(F')            | TS4(TS4')        |
|----------|------------------|------------------|------------------|------------------|
| C6-H6(Å) | 1.097<br>(1.099) | 1.443<br>(1.418) | -                | -                |
| C1-H6(Å) | 2.148<br>(2.152) | 1.249<br>(1.284) | -                | -                |
| C1-C6(Å) | 1.522<br>(1.520) | 1.399<br>(1.396) | 1.544<br>(1.541) | 1.395<br>(1.402) |
| C6-C2(Å) | -                | -                | 2.556<br>(2.587) | 2.010<br>(1.949) |
| C1-C2(Å) | -                | -                | 1.551<br>(1.551) | 1.756<br>(1.693) |

Table S4 Mulliken charges of important atoms from reactants to transition states in the ring expansion process from dimethylcyclopentane to methylcyclohexene  
 (The corresponding structures of E(E'), TS3(TS3'), F(F'), TS4(TS4') are shown in Figure 3)

| /e | E(E')    | TS3(TS3') | F(F')    | TS4(TS4') |
|----|----------|-----------|----------|-----------|
| C1 | 0.286    | 0.041     | -0.116   | -0.072    |
|    | (0.283)  | (0.141)   | (-0.070) | (-0.034)  |
| C6 | -0.542   | -0.068    | -0.199   | 0.001     |
|    | (-0.548) | (-0.112)  | (-0.202) | (0.035)   |
| H6 | 0.199    | 0.235     | -        | -         |
|    | (0.189)  | (0.225)   |          |           |
| C2 | -        | -         | 0.091    | -0.017    |
|    |          |           | (-0.312) | (-0.341)  |

Table S5 Geometric parameters of reactants, transition states and products from methylcyclohexene to methylcyclohexadiene  
(The corresponding structures of J(J'), TS6(TS6'), K(K'), TS7(TS7'), M(M'), TS8(TS8'), N(N') are shown in Figure 4)

| /Å      | J(J')            | TS6(TS6')        | K(K')            | TS7(TS7')        | M(M')            | TS8(TS8')        | N(N')            |
|---------|------------------|------------------|------------------|------------------|------------------|------------------|------------------|
| Ga-O1   | 2.125<br>(2.121) | 1.978<br>(1.980) | 2.006<br>(1.986) | 1.938<br>(1.934) |                  | -                |                  |
| Ga-O2   | 1.931<br>(1.926) | 1.954<br>(1.955) | 2.026<br>(2.022) | 1.919<br>(1.929) | -                | -                |                  |
| Ga-O3   | 2.038<br>(2.038) | 2.717<br>(2.717) | 3.140<br>(3.183) | 3.060<br>(2.939) | 3.204<br>(3.009) | 3.080<br>(3.112) | 3.161<br>(3.321) |
| O3-H8   | 2.531            | 1.307            | 0.970            | 1.425            |                  |                  |                  |
| (O3-H5) | (2.453)          | (1.298)          | (1.002)          | (1.395)          | -                | -                |                  |
| Ga-C2   | 2.901            | 2.121            |                  |                  | 1.984            | 3.251            | 3.220            |
| (Ga-C5) | (2.851)          | (2.086)          | -                | -                | (1.949)          | (3.242)          | (3.332)          |
| C2-H8   | 1.160            | 1.442            |                  |                  |                  |                  |                  |
| (C5-H5) | (1.142)          | (1.408)          | -                | -                | -                | -                |                  |
| H7-H8   |                  |                  | 2.284            | 0.871            |                  |                  |                  |
| (H7-H5) | -                | -                | (3.656)          | (0.901)          | -                | -                |                  |
| Ga- H7  | -                | -                | 1.561<br>(1.554) | 1.793<br>(1.790) | -                | -                |                  |
| C2-C3   |                  |                  |                  |                  | 1.544            | 1.390            | 1.347            |
| (C5-C4) | -                | -                | -                | -                | (1.543)          | (1.388)          | (1.344)          |
| C3-H3   |                  |                  |                  |                  | 1.092            | 1.393            | 2.176            |
| (C4-H4) | -                | -                | -                | -                | (1.092)          | (1.356)          | (2.295)          |
| O4-H3   |                  |                  |                  |                  | 2.475            | 1.255            | 0.988            |
| (O4-H4) | -                | -                | -                | -                | (2.548)          | (1.316)          | (0.985)          |

Table S6 Mulliken charges of important atoms of reactants, transition states and products from methylcyclohexene to methylcyclohexadiene  
(The corresponding structures of J(J') , TS6(TS6'), K(K'), TS7(TS7'), M(M'), TS8(TS8'), N(N') are shown in Figure 4)

| /e     | J(J')              | TS6(TS6')          | K(K')              | TS7(TS7')          | M(M')              | TS8(TS8')          | N(N')              |
|--------|--------------------|--------------------|--------------------|--------------------|--------------------|--------------------|--------------------|
| Ga     | 0.444<br>(0.468)   | 0.220<br>(0.274)   | 0.105<br>(0.106)   | 0.352<br>(0.414)   | 0.541<br>(0.572)   | 0.446<br>(0.431)   | 0.458<br>(0.454)   |
| O1     | -0.657<br>(-0.661) | -0.589<br>(-0.601) | -0.561<br>(-0.561) | -0.587<br>(-0.572) | -                  | -                  |                    |
| O2     | -0.540<br>(-0.540) | -0.543<br>(-0.551) | -0.538<br>(-0.550) | -0.546<br>(-0.566) | -                  | -                  |                    |
| O3     | -0.601<br>(-0.605) | -0.640<br>(-0.644) | -0.489<br>(-0.513) | -0.645<br>(-0.644) | -                  | -                  |                    |
| C2(C5) | 0.226<br>(-0.035)  | -0.070<br>(-0.354) | -                  | -                  | 0.355<br>(0.125)   | 0.469<br>(0.264)   | 0.152<br>(-0.125)  |
| H8(H5) | 0.058<br>(0.084)   | 0.450<br>(0.448)   | 0.388<br>(0.388)   | 0.329<br>(0.341)   | -                  | -                  |                    |
| H7     | -                  | -                  | 0.116<br>(0.155)   | 0.009<br>(-0.000)  | -                  | -                  |                    |
| C3(C4) | -                  | -                  | -                  | -                  | -0.351<br>(-0.352) | -0.562<br>(-0.533) | -0.334<br>(-0.246) |
| H3(H4) | -                  | -                  | -                  | -                  | 0.208<br>(0.210)   | 0.427<br>(0.425)   | 0.398<br>(0.396)   |
| O4     | -                  | -                  | -                  | -                  | -0.651<br>(-0.648) | -0.630<br>(-0.648) | -0.517<br>(-0.520) |

Table S7 Geometric parameters of reactants, transition states and products from methylcyclohexadiene to toluene  
(The corresponding structures of P(P'), TS9(TS9'), Q(Q'), TS10(TS10'), S(S'), TS11(TS11'), T(T') are shown in Figure 4)

| /Å      | P(P')            | TS9(TS9')        | Q(Q')            | TS10(TS10')      | S(S')            | TS11(TS11')      | T(T')            |
|---------|------------------|------------------|------------------|------------------|------------------|------------------|------------------|
| Ga-O1   | 2.127<br>(2.160) | 1.955<br>(1.961) | 1.997<br>(1.990) | 1.952<br>(1.918) | -                | -                |                  |
| Ga-O2   | 1.931<br>(1.910) | 1.936<br>(1.947) | 2.026<br>(2.024) | 1.919<br>(1.920) | -                | -                |                  |
| Ga-O3   | 2.050<br>(2.059) | 2.827<br>(2.811) | 3.041<br>(3.041) | 2.682<br>(2.904) | 3.206<br>(2.805) | 3.415<br>(3.076) | 3.444<br>(3.785) |
| O3-H5   | 2.814<br>(2.278) | 1.267<br>(1.268) | 0.976<br>(0.969) | 1.308<br>(1.382) | -                | -                |                  |
| Ga-C5   | 2.868<br>(2.556) | 2.055<br>(2.066) | -                | -                | 2.052<br>(2.093) | 4.529<br>(4.819) | 3.801<br>(4.945) |
| C5-H5   | 1.092<br>(1.115) | 1.383<br>(1.390) | -                | -                | -                | -                |                  |
| H3-H5   | -                | -                | 3.377<br>(2.338) | 0.959<br>(0.894) | -                | -                |                  |
| (H4-H9) |                  |                  |                  |                  |                  |                  |                  |
| Ga-H3   | -                | -                | 1.560<br>(1.563) | 1.769<br>(1.774) | -                | -                |                  |
| (Ga-H4) |                  |                  |                  |                  |                  |                  |                  |
| C4-C5   | -                | -                | -                | -                | 1.533<br>(1.545) | 1.438<br>(1.434) | 1.393<br>(1.396) |
| (C2-C3) |                  |                  |                  |                  |                  |                  |                  |
| C4-H4   | -                | -                | -                | -                | 1.085<br>(1.088) | 1.225<br>(1.250) | 2.567<br>(2.468) |
| (C3-H3) |                  |                  |                  |                  |                  |                  |                  |
| O4-H4   | -                | -                | -                | -                | 2.699<br>(2.629) | 1.580<br>(1.500) | 0.975<br>(0.979) |
| (O4-H3) |                  |                  |                  |                  |                  |                  |                  |



Table S8 Mulliken charges of important atoms of reactants, transition states and products from methylcyclohexadiene to toluene  
(The corresponding structures of P(P') , TS9(TS9'), Q(Q'), TS10(TS10'), S(S'), TS11(TS11'), T(T')are shown in Figure 4)

| /e     | P(P')    | TS9(TS9') | Q(Q')    | TS10(TS10') | S(S')    | TS11(TS11') | T(T')    |
|--------|----------|-----------|----------|-------------|----------|-------------|----------|
| Ga     | 0.472    | 0.249     | 0.123    | 0.423       | 0.481    | 0.435       | 0.463    |
|        | (0.498)  | (0.261)   | (0.139)  | (0.381)     | (0.488)  | (0.436)     | (0.475)  |
| O1     | -0.654   | -0.590    | -0.562   | -0.583      | -        | -           |          |
|        | (-0.675) | (-0.591)  | (-0.558) | (-0.581)    |          |             |          |
| O2     | -0.540   | -0.540    | -0.564   | -0.567      | -        | -           |          |
|        | (-0.542) | (-0.549)  | (-0.532) | (-0.541)    |          |             |          |
| O3     | -0.611   | -0.654    | -0.500   | -0.663      | -        | -           |          |
|        | (-0.621) | (-0.641)  | (-0.495) | (-0.654)    |          |             |          |
| C5(C2) | -0.049   | -0.382    | -        | -           | -0.051   | 0.118       | -0.214   |
|        | (-0.200) | (-0.407)  |          |             | (-0.026) | (0.094)     | (-0.319) |
| H5(H9) | 0.155    | 0.433     | 0.377    | 0.364       | -        | -           |          |
|        | (0.143)  | (0.439)   | (0.386)  | (0.347)     |          |             |          |
| H3(H4) | -        | -         | 0.144    | -0.001      | -        | -           |          |
|        |          |           | (0.126)  | (0.017)     |          |             |          |
| C4(C3) | -        | -         | -        | -           | -0.259   | -0.471      | -0.133   |
|        |          |           |          |             | (-0.078) | (-0.275)    | (0.143)  |
| H4(H3) | -        | -         | -        | -           | 0.220    | 0.402       | 0.386    |
|        |          |           |          |             | (0.218)  | (0.406)     | (0.397)  |
| O4     | -        | -         | -        | -           | -0.651   | -0.683      | -0.519   |
|        |          |           |          |             | (-0.629) | (-0.667)    | (-0.502) |
